# Supplementary material for: Highly emissive, nine-coordinate enantiopure lanthanide complexes incorporating tetraazatriphenylenes as probes for DNA
Source: Royal Society of Chemistry journal article supplement (doi:10.1039/b201451n), 2002-03-25
Supplement: b201451n.doc [file b201451n.doc]

# **ESI captions**

# Figure S1

1. Total luminescence emission (upper) and circularly polarised luminescence spectra for -[Eu**2**]3+ (positive at 588 and 618 nm) and -[Eu**2**]3+ (exc 350 nm, pH 7.4, 10 mM HEPES, 10 mM NaCl, 295 K).
2. Total luminescence emission (upper) and circularly polarised luminescence spectra for -[Tb**1**]3+ (positive at 546 nm) and -[Tb**1**]3+ (exc 340 nm, pH 7.4, 10 mM HEPES, 10 mM NaCl, 295 K).

# Figure S2a

CD difference spectra for poly(dAdT) (8M) in the presence of increasing ratios of -[Eu**1**]3+ (lower; 0 to 5 M) and for -[Eu**1**]3+ following addition of poly(dAdT) (upper; as for Figure 1 ) (pH 7.4, 10 mM HEPES, 10, NaCl, 295 K).

# Figure S3

1. CD difference spectra for poly(dAdT) in the presence of increasing ratios of -[Eu**1**]3+ (pH 7.4, 10 mM HEPES, 10, NaCl, 295 K).
2. CD difference spectra for poly(dGdC) in the presence of increasing ratios of -[Eu**1**]3+ (pH 7.4, 10 mM HEPES, 10, NaCl, 295 K).

# Figure S4

1. Stern-Volmer plot for -and -[Eu**2**] + poly(dGdC) in the presence of increasing ratios of NaI.
2. Stern-Volmer plot for -[Eu**2**], + poly(dGdC) and + poly(dAdT) in the presence of increasing ratios of NaI.
3. Stern-Volmer plot for -[Eu**1**], + poly(dGdC) and + poly(dAdT) in the presence of increasing ratios of NaI.
4. Stern-Volmer plot for -[Eu**1**], + poly(dGdC) and + poly(dAdT) in the presence of increasing ratios of NaI.
